# Supplementary material
Source: publisher site journal article supplement (https://www.degruyterbrill.com/publication/isbn/9781937585006/downloadAsset/9781937585006_Multimedia%20Web%20Deisng%20and%20Development.zip)
Supplement: Supplementary file 1 [file Readme2.doc]

Copyright ©2013 by Mercury Learning and Information LLC. All rights reserved.

*This publication, portions of it, any companion materials, or its derivations, may not be reproduced*

*in any way, stored in a retrieval system of any type, or transmitted by any means, media, electronic*

*display or mechanical display, including, but not limited to, photocopies, recordings, Internet postings,*

*or scans, without prior permission in writing from the publisher.*

Publisher: David Pallai

Mercury Learning and Information

22841 Quicksilver Drive

Dulles, VA 20166

info@merclearning.com

www.merclearning.com

1-800-758-3756

This book is printed on acid-free paper.

T. Richardson & C. Thies. *Multimedia Web Design and Development*

ISBN: 9781936420384

The publisher recognizes and respects all marks used by companies, manufacturers, and

developers as a means to distinguish their products. All brand names and product names

Mentioned in this book are trademarks or service marks of their respective companies.

Any omission or misuse (of any kind) of service marks or trademarks, etc. is not an attempt to infringe on the property of others.

Library of Congress Control Number: 2012952664

Printed in the United States of America

Our titles are available for adoption, license, or bulk purchase by institutions, corporations, etc.

For additional information, please contact the Customer Service Dept. at 1-800-758-3756

(toll free).

The sole obligation of Mercury Learning and Information to the purchaser is to replace the

disc, based on defective materials or faulty workmanship, but not based on the operation or

functionality of the product.

**LICENSE, DISCLAIMER OF LIABILITY, AND LIMITED WARRANTY**

By purchasing or using this book (the “Work”), you agree that this license grants

permission to use the contents contained herein, but does not give you the right

of ownership to any of the textual content in the book or ownership to any of the

information or products contained in it. *This license does not permit uploading of the*

*Work onto the Internet or on a network (of any kind) without the written consent of*

*the Publisher.* Duplication or dissemination of any text, code, simulations, images, etc.

contained herein is limited to and subject to licensing terms for the respective products, and permission must be obtained from the Publisher or the owner of the content, etc., in order to reproduce or network any portion of the textual material (in any media) that is contained in the Work.

MERCURY LEARNING AND INFORMATION LLC (“MLI” or “the Publisher”) and anyone involved in the creation, writing, or production of the companion disc, accompanying algorithms, code, or computer programs (“the software”), and any accompanying Web site or software of the Work, cannot and do not warrant the performance or results that might be obtained by using the contents of the Work. The author, developers, and the Publisher have used their best efforts to insure the accuracy and functionality of the textual material and/or programs contained in this package; we, however, make no warranty of any kind, express or implied, regarding the performance of these contents or programs. The Work is sold “as is” without warranty (except for defective materials used in manufacturing the book or due to faulty workmanship).

The author, developers, and the publisher of any accompanying content, and anyone involved in the composition, production, and manufacturing of this work will not be liable for damages of any kind arising out of the use of (or the inability to use) the algorithms, source code, computer programs, or textual material contained in this publication. This includes, but is not limited to, loss of revenue or profit, or other incidental, physical, or consequential damages arising out of the use of this Work.

The sole remedy in the event of a claim of any kind is expressly limited to replacement of the book, and only at the discretion of the Publisher. The use of “implied warranty” and certain “exclusions” vary from state to state, and might not apply to the purchaser of this product.
